# Supplementary material for: Collective acceleration of electrons using autoacceleration process. Memorandum report
Source: Royal Society of Chemistry journal article supplement (doi:10.1039/d4ay00414k), 1980-07-01
Supplement: d4ay00414k1.pdf [file d4ay00414k1.pdf]

## SUPPLEMENTARY MATERIAL

### Lab-made CO<sub>2</sub> laser-engraved electrochemical sensors for ivermectin determination

Dianderson C. M. Ferreira<sup>[a]</sup>, Nélio I. G. Inoque<sup>[b]</sup>, Auro Atsushi Tanaka<sup>[a]</sup>, Luiza M. F. Dantas<sup>[a]</sup>, Rodrigo A. A. Muñoz<sup>[b]\*</sup>, Iranaldo S. da Silva<sup>[a]\*\*</sup>

<sup>[a]</sup> Chemistry Technology Department, Federal University of Maranhão, 65080-805, São Luís, Maranhão, Brazil.

<sup>[b]</sup> Institute of Chemistry, Federal University of Uberlândia, 38408-100 Uberlândia, MG, Brazil.

#### Corresponding author:

e-mail: \*munoz@ufu.br and ORCID: 0000-0001-8230-5825

\*\*iranaldo.ss@ufma.br ORCID: 0000-0001-6216-9141

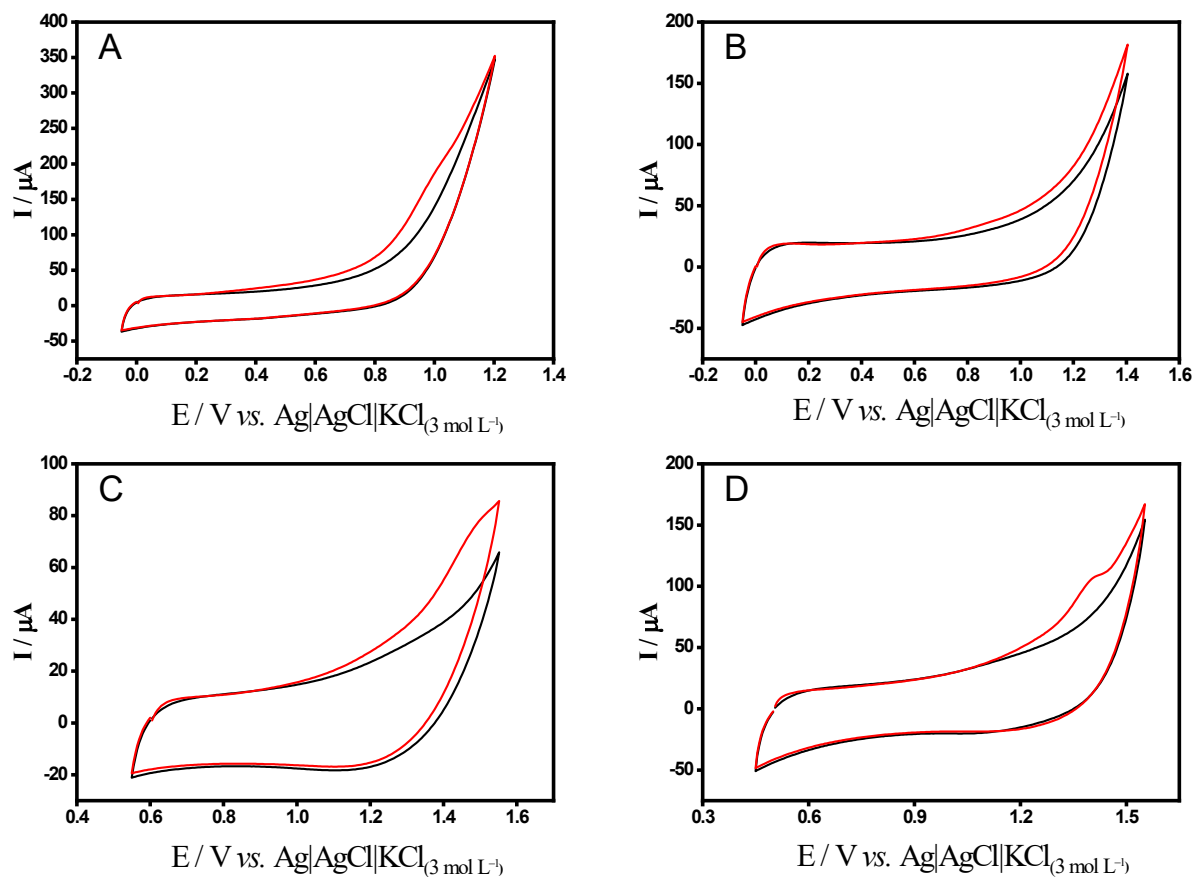

**Fig. S1** Cyclic voltammograms recorded using  $50 \mu\text{mol L}^{-1}$  IVM in  $0.12 \text{ mol L}^{-1}$  BR (30% ethanol), (A) pH 12.0, (B) pH 7.0, (C) pH 2.0 and (D) in  $0.1 \text{ mol L}^{-1}$   $\text{H}_2\text{SO}_4$  (30% ethanol) for the LIG electrode. Instrumental conditions: scan rate =  $50 \text{ mV s}^{-1}$  and step potential =  $5 \text{ mV s}^{-1}$

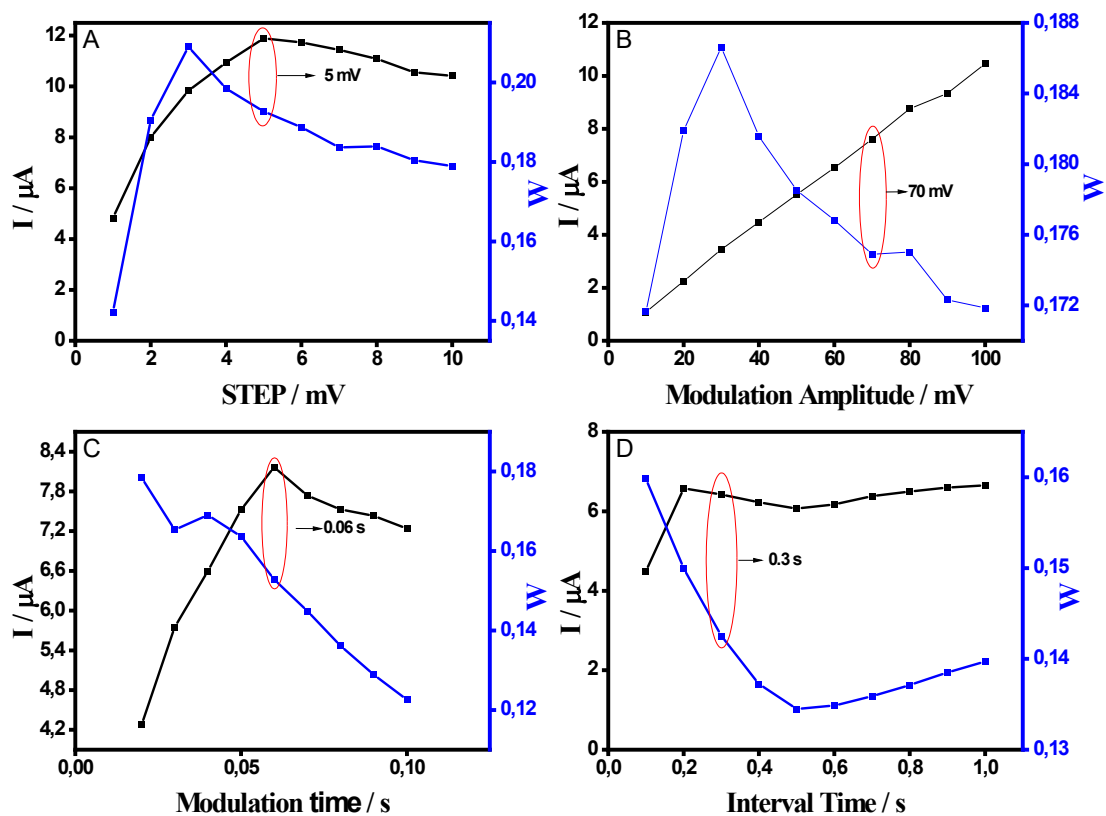

**Fig. S2** Optimization of the DPV parameters: (A) Potential Step (1.0 to 10.0 mV), (B) Modulation Amplitude (10.0 to 100.0 mV), (C) Modulation Time (0.02 to 0.10 s), and (D) Interval Time (0.10 to 1.00 s), recorded using  $50 \mu\text{mol L}^{-1}$  IVM in  $0.1 \text{ mol L}^{-1}$   $\text{H}_2\text{SO}_4$  (30% ethanol), for the LIG electrode.

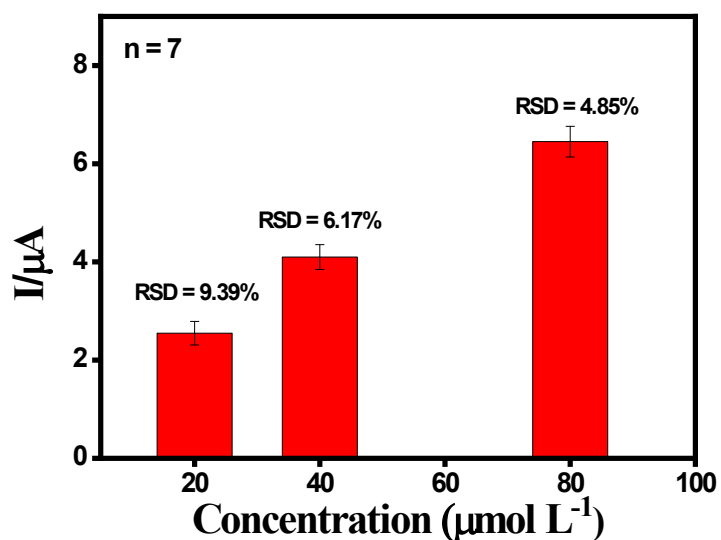

**Fig. S3** Repeatability study with consecutive measurements ( $n=7$ ) at different concentrations of IVM (20, 40, and 80  $\mu\text{mol L}^{-1}$ ). DPV conditions: Potential step: 0.5 mV, modulation amplitude: 70 mV, modulation time: 0.06 s, and interval time: 0.3 s, supporting electrolyte: 0.1 mol L<sup>-1</sup> H<sub>2</sub>SO<sub>4</sub> solution (30% ethanol, v/v).

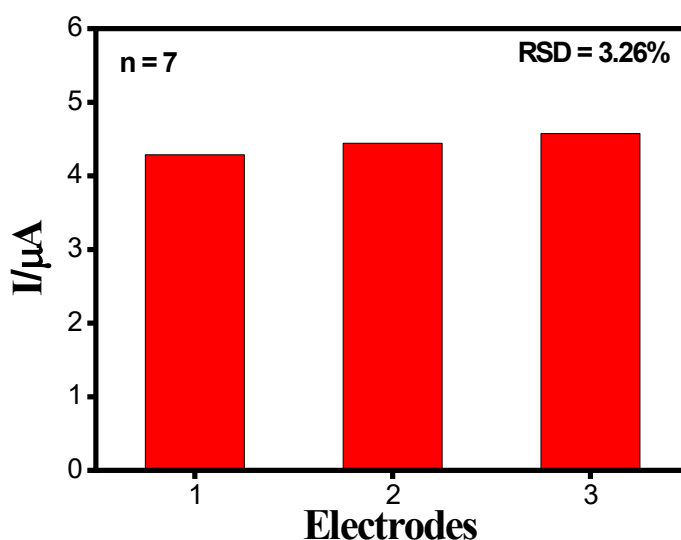

**Fig. S4** Reproducibility study with consecutive measurements ( $n=7$ ) at different electrodes, recorded using 40  $\mu\text{mol L}^{-1}$  IVM. DPV conditions: Potential step: 0.5 mV, modulation amplitude: 70 mV, modulation time: 0.06 s, and interval time: 0.3 s, supporting electrolyte: 0.1 mol L<sup>-1</sup> H<sub>2</sub>SO<sub>4</sub> solution (30% ethanol, v/v).
